# Supplementary material for: Protein Succinylation and Malonylation as Potential Biomarkers in Schizophrenia
Source: MDPI journal article supplement (doi:10.3390/jpm12091408), 2022-08-30
Supplement: s1 [file s1]

Supplementary Data S1: Patient information from postmortem donations

Supplementary Data S2: Postmortem Tissue Modification Count Tables

Supplementary Data S3: Tissue Pathway Identification Information

Supplementary Data S4: MK-801 Pathway Tables

Supplementary Data S5: Haloperidol Pathway Tables

Supplementary Data S6: Chlorpromazine Pathway Tables

Supplementary Data S7: Quetiapine Pathway Tables

Supplementary Data S8: Number of Modified Acylation Sites by MK-801 and Antipsychotics

Supplementary Data S9: Number of Succinylation and Malonylation Sites with Antipsychotic Treatment

Supplementary Data S1: Patient information from postmortem donations

| Age | Gender | PMI (hours) | pH  | Duration of Disease (years) | Duration of Medication (years) | Atyp typ | CPE last dose | CPE last ten years | Cause of Death                 | Age at Onset | Last Medication                                           | Cigarettes | Hosp | ECT |
|-----|--------|-------------|-----|-----------------------------|--------------------------------|----------|---------------|--------------------|--------------------------------|--------------|-----------------------------------------------------------|------------|------|-----|
| 64  | F      | 11          | 6.7 | 48                          | 45                             | 3        | 1536          | 7.7                | pulmonary insufficiency        | 16           | Clozapine 500 mg, Haloperidol 40 mg, Ciatyl 40 mg         | 0          | 21   | yes |
| 73  | M      | 20          | 6.6 | 43                          | 40                             | 1        | 507.4         | 1.7                | heart infarction               | 30           | Perphenazine 32 mg, Promethazine 150 mg                   | 30/day     | 33   | no  |
| 43  | M      | 18          | 6.9 | 22                          | 20                             | 2        | 464           | 2.6                | heart infarction               | 20           | Zuclopethixol 40 mg, Valproate 1200 mg, Tiapride 300 mg   | 0          | 13   | no  |
| 77  | F      | 32          | 6.5 | 49                          | 48                             | 2        | 2555          | 8.3                | lung embolism                  | 28           | Clozapine 400 mg, Benperidol 25 mg, Chlorprothixen 150 mg | 0          | 48   | yes |
| 76  | F      | 17          | 6.8 | 49                          | 47                             | 1        | 300           | 4.9                | cardio-pulmonary insufficiency | 27           | Perazine 300 mg                                           | 0          | 30   | yes |
| 63  | F      | 31          | 6.8 | 40                          | 30                             | 3        | 75            | 1.8                | heart infarction               | 24           | Olanzapine 15 mg                                          | 30/day     | 30   | yes |
| 92  | F      | 37          | 6.9 | 51                          | 48                             | 1        | 100           | 3.4                | cardio-pulmonary insufficiency | 41           | Prothipendyl 160 mg, Perazine 100 mg                      | 0          | 51   | no  |
| 71  | M      | 28          | 6.4 | 40                          | 35                             | 1        | 782.4         | 10                 | heart infarction               | 30           | Haloperidol 32 mg, Pipamperone 40 mg                      | 40/day     | 12   | no  |
| 51  | M      | 7           | 6.1 | 25                          | 25                             | 1        | 147           | 0.6                | heart infarction               | 19           | Flupenthixol 15 mg                                        | 30/day     | 20   | no  |
| 51  | M      | 12          | 6.7 | 28                          | 25                             | 2        | 450           | 1.8                | heart infarction               | 23           | Clozapine 500 mg                                          | 30/day     | 17   | no  |
| 81  | M      | 4           | 6.7 | 62                          | 50                             | 1        | 92.8          | 1.4                | heart insufficiency            | 19           | Haloperidol 40 mg, Prothipendyl 80 mg                     | 20         | 48   | no  |
| 64  | F      | 23          | 6.6 | 41                          | 40                             | 2        | 54.5          | 4.6                | heart infarction               | 24           | Zotepine 150 mg, Olanzapine 10 mg                         | 20/day     | 5    | yes |

Table S1-Donor Information for schizophrenia postmortem tissue. No patients reported alcohol use. PMI – postmortem interval; atyp typ – relation between duration of atypical and typical neuroleptics during the patient's lifetime; CPE – calculated chlorpromazine equivalent dose (last dose, mg; last 10 years, kg); Hosp – lifetime hospitalization time (years); ECT – electroconvulsive therapy.

| Age | Gender | PMI<br>(hours) | pH  | Cause of<br>Death                     |
|-----|--------|----------------|-----|---------------------------------------|
| 41  | M      | 7              | 6.5 | heart infarction                      |
| 91  | F      | 16             | 6.7 | cardio-<br>pulmonary<br>insufficiency |
| 69  | F      | 96             | 6.4 | lung embolism                         |
| 57  | M      | 24             | 6.9 | heart infarction                      |
| 53  | M      | 18             | 7.0 | heart infarction                      |
| 63  | M      | 13             | 6.5 | heart infarction                      |
| 66  | M      | 16             | 6.8 | heart infarction                      |
| 79  | M      | 24             | 6.4 | heart infarction                      |

*Table S2-Information for postmortem controls. No control donors reported cigarette or alcohol use. PMI – postmortem interval.*

Supplementary Data S2: Postmortem Tissue Modification Count Tables

*Table S3-Numbers of proteins/sites of succinylation found to be dysregulated in schizophrenia in mitochondria-enriched samples (ANOVA  $\leq 0.05$ ).*

| Succinylation | PCC    | CN    | CER   | Total   |
|---------------|--------|-------|-------|---------|
| Upregulated   | 2 / 2  | 2 / 2 | 2 / 2 | 6 / 6   |
| Downregulated | 8 / 7  | 2 / 2 | 6 / 6 | 16 / 15 |
| Total Sites   | 10 / 9 | 4 / 4 | 8 / 8 | 22 / 21 |

*Table S4- Numbers of proteins/sites of malonylation found to be dysregulated in schizophrenia in mitochondria-enriched samples (ANOVA  $\leq 0.05$ ).*

| Malonylation  | PCC     | CN    | CER   | Total   |
|---------------|---------|-------|-------|---------|
| Upregulated   | 9 / 7   | 1 / 1 | 3 / 3 | 13 / 11 |
| Downregulated | 4 / 4   | 0 / 0 | 6 / 5 | 10 / 9  |
| Total Sites   | 13 / 10 | 1 / 1 | 9 / 8 | 23 / 19 |

*Table S5-Numbers of proteins/sites of succinylation found to be dysregulated in schizophrenia in total cell lysate samples (ANOVA  $\leq 0.05$ ).*

| Succinylation | CC      | CER     | Total     |
|---------------|---------|---------|-----------|
| Upregulated   | 6 / 4   | 21 / 20 | 27 / 24   |
| Downregulated | 76 / 60 | 7 / 7   | 83 / 67   |
| Total Sites   | 82 / 63 | 28 / 27 | 110 / 100 |

*Table S6-Numbers of proteins/sites of malonylation found to be dysregulated in schizophrenia in total cell lysate samples (ANOVA  $\leq 0.05$ ).*

| Malonylation  | CC      | CER     | Total    |
|---------------|---------|---------|----------|
| Upregulated   | 4 / 4   | 31 / 27 | 35 / 30  |
| Downregulated | 79 / 58 | 8 / 8   | 87 / 66  |
| Total Sites   | 83 / 61 | 39 / 34 | 122 / 93 |

For all tables above: PCC, posterior cingulate cortex; CN, caudate nucleus; CER, cerebellum; CC, corpus callosum.

### Supplementary Data S3: Tissue Pathway Identification Information

The conditions that are not detailed below did not identify any pathways in the Reactome Knowledgebase with an FDR  $\leq 0.01$  and are not included here.

*Table S7-Pathways identified with Reactome.org with FDR  $\leq 0.01$  for proteins with downregulated sites of succinylation in mitochondria-enriched lysates.*

| Downregulated Succinylation Mitochondria  | Entities |       |          |          | Reactions |       |
|-------------------------------------------|----------|-------|----------|----------|-----------|-------|
| Pathway Name                              | Found    | Ratio | p-Value  | FDR      | Found     | Ratio |
| Detoxification of Reactive Oxygen Species | 4 / 39   | 0.003 | 5.57e-07 | 2.75e-04 | 5 / 34    | 0.003 |

*Table S8-Pathways identified with Reactome.org with FDR  $\leq 0.01$  for proteins with up- and down-regulated sites of succinylation in mitochondria-enriched lysates.*

| Overall Succinylation Mitochondria        | Entities |       |          |          | Reactions |       |
|-------------------------------------------|----------|-------|----------|----------|-----------|-------|
| Pathway Name                              | Found    | Ratio | p-Value  | FDR      | Found     | Ratio |
| Detoxification of Reactive Oxygen Species | 4 / 39   | 0.003 | 1.79e-06 | 9.48e-04 | 5 / 34    | 0.003 |
| Cellular responses to stress              | 7 / 408  | 0.037 | 2.36e-05 | 0.006    | 16 / 184  | 0.015 |

*Table S9-Pathways identified with Reactome.org with FDR  $\leq 0.01$  for proteins with downregulated sites of succinylation in total cell lysates.*

| Downregulated Succinylation Total Lysate        | Entities |       |          |       | Reactions |       |
|-------------------------------------------------|----------|-------|----------|-------|-----------|-------|
| Pathway Name                                    | Found    | Ratio | p-Value  | FDR   | Found     | Ratio |
| Regulation of HSF1-mediated heat shock response | 6 / 75   | 0.007 | 5.97e-06 | 0.002 | 7 / 14    | 0.001 |
| Cellular response to heat stress                | 6 / 95   | 0.009 | 2.25e-05 | 0.004 | 11 / 29   | 0.002 |
| trans-Golgi Network Vesicle Budding             | 5 / 74   | 0.007 | 8.24e-05 | 0.01  | 9 / 19    | 0.002 |

*Table S10-Pathways identified with Reactome.org with  $FDR \leq 0.01$  for proteins with up- and down-regulated sites of succinylation in total cell lysates.*

| Overall Succinylation<br>Total Lysate           | Entities |       |          |       | Reactions |          |
|-------------------------------------------------|----------|-------|----------|-------|-----------|----------|
| Pathway Name                                    | Found    | Ratio | p-Value  | FDR   | Found     | Ratio    |
| Regulation of HSF1-mediated heat shock response | 7 / 75   | 0.007 | 2.46e-06 | 0.001 | 7 / 14    | 0.001    |
| Cristae formation                               | 5 / 31   | 0.003 | 5.38e-06 | 0.001 | 2 / 2     | 1.65e-04 |
| Cellular response to heat stress                | 7 / 95   | 0.009 | 1.14e-05 | 0.001 | 11 / 29   | 0.002    |
| Mitochondrial biogenesis                        | 7 / 96   | 0.009 | 1.21e-05 | 0.001 | 5 / 36    | 0.003    |
| Formation of ATP by chemiosmotic coupling       | 4 / 18   | 0.002 | 1.42e-05 | 0.001 | 3 / 3     | 2.48e-04 |

*Table S11-Pathways identified with Reactome.org with  $FDR \leq 0.01$  for proteins with downregulated sites of malonylation in total cell lysates.*

| Downregulated Malonylation<br>Total Lysate                | Entities |       |          |          | Reactions |          |
|-----------------------------------------------------------|----------|-------|----------|----------|-----------|----------|
| Pathway Name                                              | Found    | Ratio | p-Value  | FDR      | Found     | Ratio    |
| COPI-mediated anterograde transport                       | 8 / 102  | 0.009 | 2.50e-07 | 4.98e-05 | 6 / 12    | 9.91e-04 |
| ER to Golgi Anterograde Transport                         | 9 / 155  | 0.015 | 5.20e-07 | 5.14e-05 | 17 / 39   | 0.003    |
| Transport to the Golgi and subsequent modification        | 9 / 186  | 0.017 | 2.31e-06 | 1.82e-04 | 17 / 60   | 0.005    |
| Membrane Trafficking                                      | 15 / 635 | 0.057 | 6.46e-06 | 3.99e-04 | 73 / 218  | 0.018    |
| Neutrophil degranulation                                  | 13 / 480 | 0.043 | 7.00e-06 | 3.99e-04 | 7 / 10    | 8.25e-04 |
| COPI-independent Golgi-to-ER retrograde traffic           | 5 / 53   | 0.005 | 2.12e-05 | 0.001    | 2 / 7     | 5.78e-04 |
| HSP90 chaperone cycle for steroid hormone receptors (SHR) | 5 / 57   | 0.005 | 3.00e-05 | 0.001    | 1 / 12    | 9.91e-04 |
| Vesicle-mediated transport                                | 15 / 761 | 0.068 | 5.36e-05 | 0.002    | 73 / 251  | 0.021    |
| Caspase-mediated cleavage of cytoskeletal proteins        | 3 / 12   | 0.001 | 6.20e-05 | 0.002    | 3 / 10    | 8.25e-04 |
| Organelle biogenesis and maintenance                      | 9 / 298  | 0.027 | 9.29e-05 | 0.003    | 19 / 86   | 0.007    |
| Asparagine N-linked glycosylation                         | 9 / 305  | 0.027 | 1.11e-04 | 0.003    | 17 / 144  | 0.012    |
| Cilium Assembly                                           | 7 / 202  | 0.018 | 2.59e-04 | 0.007    | 17 / 50   | 0.004    |

*Table S12-Pathways identified with Reactome.org with FDR  $\leq 0.01$  for proteins with up- and down-regulated sites of malonylation in total cell lysates.*

| Overall Malonylation<br>Total Lysate                      | Entities |       |          |          | Reactions |          |
|-----------------------------------------------------------|----------|-------|----------|----------|-----------|----------|
| Pathway Name                                              | Found    | Ratio | p-Value  | FDR      | Found     | Ratio    |
| COPI-mediated anterograde transport                       | 10 / 107 | 0.008 | 3.09E-09 | 8.53E-07 | 6 / 12    | 9.91E-04 |
| ER to Golgi Anterograde Transport                         | 11 / 164 | 0.012 | 1.44E-08 | 1.99E-06 | 17 / 39   | 0.003    |
| Transport to the Golgi and subsequent modification        | 11 / 219 | 0.015 | 2.58E-07 | 2.84E-05 | 17 / 60   | 0.005    |
| Membrane Trafficking                                      | 18 / 665 | 0.047 | 3.59E-07 | 3.30E-05 | 73 / 218  | 0.018    |
| Vesicle-mediated transport                                | 19 / 824 | 0.058 | 1.78E-06 | 1.39E-04 | 77 / 251  | 0.021    |
| COPI-independent Golgi-to-ER retrograde traffic           | 6 / 63   | 0.004 | 4.53E-06 | 3.12E-04 | 2 / 7     | 5.78E-04 |
| HSP90 chaperone cycle for steroid hormone receptors (SHR) | 6 / 70   | 0.005 | 8.21E-06 | 5.01E-04 | 1 / 12    | 9.91E-04 |
| Neutrophil degranulation                                  | 13 / 480 | 0.034 | 1.80E-05 | 9.92E-04 | 7 / 10    | 8.25E-04 |
| Asparagine N-linked glycosylation                         | 12 / 421 | 0.030 | 2.37E-05 | 0.001    | 20 / 144  | 0.012    |
| Recruitment of NuMA to mitotic centrosomes                | 6 / 97   | 0.007 | 5.04E-05 | 0.002    | 2 / 2     | 1.65E-04 |
| Interaction between L1 and Ankyrins                       | 4 / 33   | 0.002 | 7.62E-05 | 0.003    | 2 / 4     | 3.30E-04 |
| Caspase-mediated cleavage of cytoskeletal proteins        | 3 / 12   | 0.001 | 7.71E-05 | 0.003    | 3 / 10    | 8.25E-04 |
| Cilium Assembly                                           | 8 / 208  | 0.015 | 7.88E-05 | 0.003    | 17 / 50   | 0.004    |
| Organelle biogenesis and maintenance                      | 10 / 335 | 0.024 | 8.14E-05 | 0.003    | 19 / 86   | 0.007    |
| Signaling by Rho GTPases                                  | 11 / 457 | 0.032 | 2.32E-04 | 0.007    | 15 / 117  | 0.010    |
| L1CAM interactions                                        | 6 / 130  | 0.009 | 2.45E-04 | 0.007    | 4 / 54    | 0.004    |
| Apoptosis                                                 | 7 / 187  | 0.013 | 2.64E-04 | 0.008    | 8 / 139   | 0.011    |
| Programmed Cell Death                                     | 7 / 195  | 0.014 | 3.39E-04 | 0.009    | 8 / 152   | 0.013    |

Supplementary Data S4: MK-801 Pathway Tables

*Table S13-Top 10 upregulated succinylation pathways in MK-801-treated cells from Reactome.org.*

| Category                           | Pathway Name                                                        |
|------------------------------------|---------------------------------------------------------------------|
| Various                            | Metabolism of RNA                                                   |
| Various                            | Translation                                                         |
| Semaphorin / ROBO                  | Axon guidance                                                       |
| Ceruloplasmin                      | L13a-mediated translational silencing of Ceruloplasmin expression   |
| Elongation Factors                 | GTP hydrolysis and joining of the 60S ribosomal subunit             |
| Ceruloplasmin / Elongation Factors | Cap-dependent Translation Initiation                                |
|                                    | Eukaryotic Translation Initiation                                   |
| AUF1 & HuR (ELAVL1 / YWHAZ)        | Regulation of mRNA stability by proteins that bind AU-rich elements |
| AUF1                               | AUF1 (hnRNP D0) binds and destabilizes mRNA                         |
| ROBO                               | Signaling by ROBO receptors                                         |

37 of 196 accession numbers were not found in the Reactome database.



*Table S14-Top 10 downregulated succinylation pathways in MK-801-treated cells from Reactome.org.*

| Category                | Pathway Name                                                                                               |
|-------------------------|------------------------------------------------------------------------------------------------------------|
| Intron Processing / NMD | Metabolism of RNA                                                                                          |
| Elongation Factors      | Eukaryotic Translation Elongation                                                                          |
| Spliceosomes / hnRNPs   | mRNA Splicing - Major Pathway<br>mRNA Splicing                                                             |
| ROBO                    | Signaling by ROBO receptors<br>Regulation of expression of SLITs and ROBOs                                 |
| Various                 | Translation                                                                                                |
| NMD / Stress Response   | Nonsense-Mediated Decay (NMD)<br>Nonsense Mediated Decay (NMD) enhanced by the Exon Junction Complex (EJC) |
| hnRNPs                  | Processing of Capped Intron-Containing Pre-mRNA                                                            |

37 of 190 accession numbers were not found in the Reactome database.

*Table S15-Top 10 upregulated malonylation pathways in MK-801-treated cells from Reactome.org.*

| Category      | Pathway Name                                                                                       |
|---------------|----------------------------------------------------------------------------------------------------|
|               | Prefoldin mediated transfer of substrate to CCT/TriC                                               |
| CCT/TriC      | Folding of actin by CCT/TriC<br>Cooperation of Prefoldin and TriC/CCT in actin and tubulin folding |
| SRP           | SRP-dependent cotranslational protein targeting to membrane                                        |
| Various       | Metabolism of RNA                                                                                  |
| ROBO          | Axon guidance                                                                                      |
| ROBO          | Regulation of expression of SLITs and ROBOs                                                        |
| CCT/TriC      | Formation of tubulin folding intermediates by CCT/TriC                                             |
| Ceruloplasmin | L13a-mediated translational silencing of Ceruloplasmin expression                                  |
| Various       | Translation                                                                                        |

32 of 150 accession numbers were not found in the Reactome database.

*Table S16-Top 10 downregulated malonylation pathways in MK-801-treated cells from Reactome.org. 31 of 140 accession numbers were not found in the Reactome database.*

| Category | Pathway Name                                                       |
|----------|--------------------------------------------------------------------|
| CCT/TriC | Folding of actin by CCT/TriC                                       |
|          | Prefoldin mediated transfer of substrate to CCT/TriC               |
|          | Cooperation of Prefoldin and TriC/CCT in actin and tubulin folding |
|          | Formation of tubulin folding intermediates by CCT/TriC             |
|          | Association of TriC/CCT with target proteins during biosynthesis   |
| HSF1     | Cellular response to heat stress                                   |
| CCT/TriC | Chaperonin-mediated protein folding                                |
|          | Protein folding                                                    |
| Various  | Metabolism of RNA                                                  |
| HSP90    | HSP90 chaperone cycle for steroid hormone receptors (SHR)          |

*Table S17-Top 10 affected overall succinylation pathways in MK-801-treated cells from Reactome.org. 65 of 322 accession numbers were not found in the Reactome database.*

| Category        | Pathway Name                                                      |
|-----------------|-------------------------------------------------------------------|
| Various         | Metabolism of RNA                                                 |
| Various         | Translation                                                       |
| mRNA Processing | mRNA Splicing - Major Pathway                                     |
| mRNA Processing | mRNA Splicing                                                     |
| Translation     | GTP hydrolysis and joining of the 60S ribosomal subunit           |
| ROBO            | Regulation of expression of SLITs and ROBOs                       |
| Translation     | Eukaryotic Translation Elongation                                 |
| Translation     | Cap-dependent Translation Initiation                              |
| Translation     | Eukaryotic Translation Initiation                                 |
| Ceruloplasmin   | L13a-mediated translational silencing of Ceruloplasmin expression |

*Table S18-Top 10 affected overall malonylation pathways in MK-801-treated cells from Reactome.org. 52 of 247 accession numbers were not found in the Reactome database.*

| Category            | Pathway Name                                                       |
|---------------------|--------------------------------------------------------------------|
| CCT/TriC            | Folding of actin by CCT/TriC                                       |
| Various             | Metabolism of RNA                                                  |
| CCT/TriC            | Prefoldin mediated transfer of substrate to CCT/TriC               |
| CCT/TriC            | Cooperation of Prefoldin and TriC/CCT in actin and tubulin folding |
| CCT/TriC            | Formation of tubulin folding intermediates by CCT/TriC             |
| Translation         | Eukaryotic Translation Elongation                                  |
| Translation         | Peptide chain elongation                                           |
| Ceruloplasmin       | L13a-mediated translational silencing of Ceruloplasmin expression  |
| Protein Trafficking | SRP-dependent cotranslational protein targeting to membrane        |
| Translation         | GTP hydrolysis and joining of the 60S ribosomal subunit            |

Supplementary Data S5: Haloperidol Pathway Tables

*Table S19-Upregulated succinylated pathways by haloperidol in MO3.13 cells from Reactome.org. 46 of 230 accession numbers were not found in the Reactome database.*

| Category                     | Pathway Name                                                              |
|------------------------------|---------------------------------------------------------------------------|
| rRNA/mRNA Processing and NMD | Metabolism of RNA                                                         |
| Ceruloplasmin                | L13a-mediated translational silencing of Ceruloplasmin expression         |
| ROBO                         | Regulation of expression of SLITs and ROBOs                               |
| NMD                          | Nonsense-Mediated Decay (NMD)                                             |
| NMD                          | Nonsense Mediated Decay (NMD) enhanced by the Exon Junction Complex (EJC) |
| Translation                  | Cap-dependent Translation Initiation                                      |
| Translation                  | Eukaryotic Translation Initiation                                         |
| ROBO                         | Signaling by ROBO receptors                                               |
| Translation                  | GTP hydrolysis and joining of the 60S ribosomal subunit                   |
| Translation                  | Formation of a pool of free 40S subunits                                  |

*Table S20-Downregulated succinylated pathways by haloperidol in MO3.13 cells from Reactome.org. 35 of 169 accession numbers were not found in the Reactome database.*

| Category        | Pathway Name                                                  |
|-----------------|---------------------------------------------------------------|
| Various         | Translation                                                   |
| Various         | RNA Metabolism                                                |
| ROBO            | Axon guidance                                                 |
| Translation     | Eukaryotic Translation Elongation                             |
| Stress Response | Cellular responses to stress                                  |
| Translation     | Cytosolic tRNA aminoacylation                                 |
| Translation     | rRNA processing                                               |
| Translation     | Major pathway of rRNA processing in the nucleolus and cytosol |
| Vesicles        | Influenza Life Cycle                                          |
| ROBO            | Signaling by ROBO receptors                                   |

*Table S21-Upregulated malonylated pathways by haloperidol in MO3.13 cells from Reactome.org. 42 of 210 accession numbers were not found in the Reactome database.*

| Category            | Pathway Name                                                                 |
|---------------------|------------------------------------------------------------------------------|
| Translation         | Peptide chain elongation                                                     |
| Translation         | Translation                                                                  |
| Translation         | Eukaryotic Translation Elongation                                            |
| Ceruloplasmin       | L13a-mediated translational silencing of Ceruloplasmin expression            |
| Ribosomal Function  | GTP hydrolysis and joining of the 60S ribosomal subunit                      |
| Ribosomal Function  | Formation of a pool of free 40S subunits                                     |
| Translation         | Cap-dependent Translation Initiation                                         |
| Translation         | Eukaryotic Translation Initiation                                            |
| NMD                 | Nonsense Mediated Decay (NMD) independent of the Exon Junction Complex (EJC) |
| Protein Trafficking | SRP-dependent cotranslational protein targeting to membrane                  |

*Table S22-Downregulated malonylated pathways by haloperidol in MO3.13 cells from Reactome.org. 23 of 126 accession numbers were not found in the Reactome database.*

| Category       | Pathway Name                                                      |
|----------------|-------------------------------------------------------------------|
| Translation    | Eukaryotic Translation Elongation                                 |
| Translation    | Peptide chain elongation                                          |
| RNA Metabolism | Metabolism of RNA                                                 |
| Infection      | Influenza Life Cycle                                              |
| Infection      | Influenza Infection                                               |
| Translation    | Translation                                                       |
| Translation    | Formation of a pool of free 40S subunits                          |
| Vesicles       | Infectious disease                                                |
| RNA Metabolism | rRNA processing                                                   |
| Ceruloplasmin  | L13a-mediated translational silencing of Ceruloplasmin expression |

Supplementary Data S6: Chlorpromazine Pathway Tables

*Table S23-Upregulated succinylated pathways by chlorpromazine in MO3.13 cells from Reactome.org. 15 of 95 accession numbers were not found in the Reactome database.*

| Category        | Pathway Name                                                      |
|-----------------|-------------------------------------------------------------------|
| Stress Response | Cellular responses to stress                                      |
| Stress Response | Cellular response to heat stress                                  |
| Stress Response | Cellular responses to external stimuli                            |
| Stress Response | Regulation of HSF1-mediated heat shock response                   |
| RNA Metabolism  | Metabolism of RNA                                                 |
| Ceruloplasmin   | L13a-mediated translational silencing of Ceruloplasmin expression |
| Translation     | GTP hydrolysis and joining of the 60S ribosomal subunit           |
| Translation     | Translation                                                       |
| Translation     | Cap-dependent Translation Initiation                              |
| Translation     | Eukaryotic Translation Initiation                                 |



*Table S24-Downregulated succinylated pathways by chlorpromazine in MO3.13 cells from Reactome.org. 11 of 70 accession numbers were not found in the Reactome database.*

| Category            | Pathway Name                                                                 |
|---------------------|------------------------------------------------------------------------------|
| Ceruloplasmin       | L13a-mediated translational silencing of Ceruloplasmin expression            |
| Translation         | Cap-dependent Translation Initiation                                         |
| Translation         | Eukaryotic Translation Initiation                                            |
| Translation         | Translation                                                                  |
| Translation         | GTP hydrolysis and joining of the 60S ribosomal subunit                      |
| NMD                 | Nonsense Mediated Decay (NMD) independent of the Exon Junction Complex (EJC) |
| Translation         | Formation of a pool of free 40S subunits                                     |
| Vesicles            | Influenza Infection                                                          |
| Protein Trafficking | SRP-dependent cotranslational protein targeting to membrane                  |
| ROBO                | Regulation of expression of SLITs and ROBOs                                  |

*Table S25-Overall dysregulated succinylated pathways by chlorpromazine in MO3.13 cells from Reactome.org. 25 of 151 accession numbers were not found in the Reactome database.*

| Category       | Pathway Name                                                      |
|----------------|-------------------------------------------------------------------|
| Ceruloplasmin  | L13a-mediated translational silencing of Ceruloplasmin expression |
| Translation    | Cap-dependent Translation Initiation                              |
| Translation    | Eukaryotic Translation Initiation                                 |
| Translation    | Translation                                                       |
| Translation    | GTP hydrolysis and joining of the 60S ribosomal subunit           |
| ROBO           | Regulation of expression of SLITs and ROBOs                       |
| RNA Metabolism | Metabolism of RNA                                                 |
| Translation    | Peptide chain elongation                                          |
| Translation    | Eukaryotic Translation Elongation                                 |
| Translation    | Formation of a pool of free 40S subunits                          |

*Table S26-Upregulated malonylated pathways by chlorpromazine in MO3.13 cells from Reactome.org. 18 of 98 accession numbers were not found in the Reactome database.*

| Category        | Pathway Name                                                                                           |
|-----------------|--------------------------------------------------------------------------------------------------------|
| Stress Response | HSP90 chaperone cycle for steroid hormone receptors (SHR)                                              |
| Translation     | L13a-mediated translational silencing of Ceruloplasmin expression                                      |
| Translation     | GTP hydrolysis and joining of the 60S ribosomal subunit                                                |
| Translation     | Cap-dependent Translation Initiation                                                                   |
| Translation     | Eukaryotic Translation Initiation                                                                      |
| Cytoskeleton    | Axon guidance                                                                                          |
| Translation     | Translation initiation complex formation                                                               |
| Translation     | Ribosomal scanning and start codon recognition                                                         |
| Translation     | Activation of the mRNA upon binding of the cap-binding complex and eIFs, and subsequent binding to 43S |
| Cytoskeleton    | Formation of tubulin folding intermediates by CCT/TriC                                                 |

*Table S27-Downregulated malonylated pathways by chlorpromazine in MO3.13 cells from Reactome.org. 9 of 65 accession numbers were not found in the Reactome database.*

| Category            | Pathway Name                                                              |
|---------------------|---------------------------------------------------------------------------|
| RNA Metabolism      | Metabolism of RNA                                                         |
| Protein Trafficking | SRP-dependent cotranslational protein targeting to membrane               |
| NMD                 | Nonsense-Mediated Decay (NMD)                                             |
| NMD                 | Nonsense Mediated Decay (NMD) enhanced by the Exon Junction Complex (EJC) |
| RNA Metabolism      | Selenoamino acid metabolism                                               |
| Translation         | Peptide chain elongation                                                  |
| Vesicles            | Influenza Infection                                                       |
| Translation         | Eukaryotic Translation Termination                                        |
| RNA Metabolism      | Selenocysteine synthesis                                                  |
| Translation         | Eukaryotic Translation Elongation                                         |

*Table S28-Overall dysregulated malonylated pathways by chlorpromazine in MO3.13 cells from Reactome.org. 26 of 154 accession numbers were not found in the Reactome database.*

| Category       | Pathway Name                                                                                           |
|----------------|--------------------------------------------------------------------------------------------------------|
| Translation    | L13a-mediated translational silencing of Ceruloplasmin expression                                      |
| Translation    | GTP hydrolysis and joining of the 60S ribosomal subunit                                                |
| RNA Metabolism | Metabolism of RNA                                                                                      |
| Translation    | Cap-dependent Translation Initiation                                                                   |
| Translation    | Eukaryotic Translation Initiation                                                                      |
| NMD            | Nonsense-Mediated Decay (NMD)                                                                          |
| NMD            | Nonsense Mediated Decay (NMD) enhanced by the Exon Junction Complex (EJC)                              |
| Translation    | Translation initiation complex formation                                                               |
| Translation    | Ribosomal scanning and start codon recognition                                                         |
| Translation    | Activation of the mRNA upon binding of the cap-binding complex and eIFs, and subsequent binding to 43S |

Supplementary Data S7: Quetiapine Pathway Tables

*Table S29-Upregulated succinylated pathways by quetiapine in MO3.13 cells from Reactome.org. 12 of 54 accession numbers were not found in the Reactome database.*

| Category        | Pathway Name                                                  |
|-----------------|---------------------------------------------------------------|
| Lamin Dimers    | Depolymerisation of the Nuclear Lamina                        |
| Stress Response | Unfolded Protein Response (UPR)                               |
| RNA Metabolism  | Metabolism of RNA                                             |
| Cell Cycle      | Nuclear Envelope Breakdown                                    |
| RNA Metabolism  | Processing of Capped Intron-Containing Pre-mRNA               |
| RNA Metabolism  | mRNA Splicing - Major Pathway                                 |
| RNA Metabolism  | Major pathway of rRNA processing in the nucleolus and cytosol |
| RNA Metabolism  | mRNA Splicing                                                 |
| RNA Metabolism  | rRNA processing in the nucleus and cytosol                    |
| RNA Metabolism  | rRNA processing                                               |

Downregulated succinylated pathways by quetiapine in MO3.13 cells did not exhibit an FDR below 4% and were not included in this analysis.

*Table S30-Overall dysregulated succinylated pathways by quetiapine in MO3.13 cells from Reactome.org. 12 of 57 accession numbers were not found in the Reactome database.*

| Category           | Pathway Name                                                  |
|--------------------|---------------------------------------------------------------|
| RNA Metabolism     | Metabolism of RNA                                             |
| RNA Metabolism     | Major pathway of rRNA processing in the nucleolus and cytosol |
| Lamin Dimers       | Depolymerisation of the Nuclear Lamina                        |
| RNA Metabolism     | rRNA processing                                               |
| Stress Response    | Unfolded Protein Response (UPR)                               |
| Cell Cycle         | Nuclear Envelope Breakdown                                    |
| RNA Metabolism     | Processing of Capped Intron-Containing Pre-mRNA               |
| RNA Splicing       | mRNA Splicing - Major Pathway                                 |
| Protein Metabolism | Metabolism of proteins                                        |
| RNA Metabolism     | mRNA Splicing                                                 |

*Table S31-Upregulated malonylated pathways by quetiapine in MO3.13 cells from Reactome.org. 9 of 47 accession numbers were not found in the Reactome database.*

| Category       | Pathway Name                                                                 |
|----------------|------------------------------------------------------------------------------|
| RNA Metabolism | Metabolism of RNA                                                            |
| Translation    | GTP hydrolysis and joining of the 60S ribosomal subunit                      |
| Translation    | Eukaryotic Translation Initiation                                            |
| Translation    | Cap-dependent Translation Initiation                                         |
| Ceruloplasmin  | L13a-mediated translational silencing of Ceruloplasmin expression            |
| RNA Metabolism | rRNA processing                                                              |
| NMD            | Nonsense Mediated Decay (NMD) independent of the Exon Junction Complex (EJC) |
| ROBO           | Regulation of expression of SLITs and ROBOs                                  |
| RNA Metabolism | Major pathway of rRNA processing in the nucleolus and cytosol                |
| RNA Metabolism | rRNA processing in the nucleus and cytosol                                   |



*Table S32-Downregulated malonylated pathways by quetiapine in MO3.13 cells from Reactome.org. 1 of 5 accession numbers were not found in the Reactome database.*

| Category            | Pathway Name                                              |
|---------------------|-----------------------------------------------------------|
| Vesicles            | Lysosome Vesicle Biogenesis                               |
| Cell Receptors      | HSP90 chaperone cycle for steroid hormone receptors (SHR) |
| Vesicles            | Clathrin derived vesicle budding                          |
| Vesicles            | trans-Golgi Network Vesicle Budding                       |
| Clathrin (Vesicles) | MHC class II antigen presentation                         |
| Heat Shock HSP90    | Aryl hydrocarbon receptor signalling                      |
| Heat Shock HSP90    | Uptake and function of diphtheria toxin                   |
| Gap Junctions       | Formation of annular gap junctions                        |
| Clathrin (Vesicles) | Entry of Influenza Virion into Host Cell via Endocytosis  |
| Gap Junctions       | Gap junction degradation                                  |

*Table S33-Overall dysregulated malonylated pathways by quetiapine in MO3.13 cells from Reactome.org. 10 of 52 accession numbers were not found in the Reactome database.*

| Category                      | Pathway Name                                                                 |
|-------------------------------|------------------------------------------------------------------------------|
| RNA Metabolism                | Metabolism of RNA                                                            |
| Translation                   | GTP hydrolysis and joining of the 60S ribosomal subunit                      |
| Translation                   | Eukaryotic Translation Initiation                                            |
| Translation                   | Cap-dependent Translation Initiation                                         |
| Ceruloplasmin                 | L13a-mediated translational silencing of Ceruloplasmin expression            |
| ROBO                          | Axon guidance                                                                |
| RNA Metabolism                | rRNA processing                                                              |
| Vesicles                      | Lysosome Vesicle Biogenesis                                                  |
| Macromolecule Export/Clathrin | Influenza Life Cycle                                                         |
| NMD                           | Nonsense Mediated Decay (NMD) independent of the Exon Junction Complex (EJC) |

Supplementary Data S8: Total Number of Modified Acylation Sites by MK-801 and  
Antipsychotics

*Table S34-Sites of protein acylation in MK-801-treated cells. Classified by Uniprot Accession Number (AN).*

|                             | Malonylation | Succinylation |
|-----------------------------|--------------|---------------|
| Total Sites                 | 349          | 502           |
| Unique ANs                  | 247          | 322           |
| ANs Upregulated             | 150          | 196           |
| ANs Downregulated           | 140          | 190           |
| Both Up- and Down-regulated | 43           | 64            |

Supplementary Data S9: Number of Succinylation and Malonylation Sites with Antipsychotic Treatment

*Table S35-Numbers of statistically perturbed (ANOVA  $\leq 0.05$ ) succinylation and malonylation sites in MO3.13 cells due to antipsychotic incubation.*

| Compound                        | Haloperidol |       | Chlorpromazine |       | Quetiapine |       |
|---------------------------------|-------------|-------|----------------|-------|------------|-------|
| Modification                    | SuccK       | MalK  | SuccK          | MalK  | SuccK      | MalK  |
| Overall Number of Sites         | 538         | 434   | 189            | 186   | 61         | 55    |
| Percentage of Modified Peptides | 35.8%       | 34.1% | 20.6%          | 20.2% | 3.51%      | 3.51% |
| Percentage of Total Peptides    | 3.16%       | 2.31% | 1.15%          | 1.41% | 0.21%      | 0.21% |
